# Supplementary material for: Development of novel and green NiFe2O4/geopolymer nanocatalyst based on bentonite for synthesis of imidazole heterocycles by ultrasonic irradiations
Source: PubMed Central journal article supplement (PMC7363903; doi:10.1038/s41598-020-68426-z), 2020-07-15
Supplement: 41598_2020_68426_MOESM1_ESM.pdf [file 41598_2020_68426_MOESM1_ESM.pdf]

## Supplementary information

---

### Development of novel and green NiFe<sub>2</sub>O<sub>4</sub>/geopolymer nanocatalyst based on bentonite for synthesis of imidazole heterocycles by ultrasonic irradiations

Zoleikha Hajizadeh, Fateme Radinekiyan,<sup>1</sup> Reza Eivazzadeh-keihan, Ali Maleki\*

*Catalysts and Organic Synthesis Research Laboratory, Department of Chemistry, Iran*

*University of Science and Technology, Tehran 16846-13114, Iran*

\*Corresponding author. E-mail: [maleki@iust.ac.ir](mailto:maleki@iust.ac.ir)

<sup>1</sup>Co-first author

---

#### Table of contents

---

| <i>Entry</i> | <i>Subject</i>                                                                                                        | <i>Page</i> |
|--------------|-----------------------------------------------------------------------------------------------------------------------|-------------|
| 1            | Table 1. Physical properties of geopolymer and NiFe <sub>2</sub> O <sub>4</sub> /geopolymer samples from BET analysis | S2          |
| 2            | Table 2. Optimization of different parameters for model reaction                                                      | S3          |
| 3            | Fig. S1. Reusability of nanocatalyst in the synthesis of <b>4a</b>                                                    | S4          |
| 4            | Fig. S2. FT-IR spectrums of recycled nanocatalyst                                                                     | S5          |
| 5            | Fig. S3. EDX analysis of recycled nanocatalyst                                                                        | S6          |
| 6            | Fig. S4. FT-IR spectrum of the product ( <b>4a</b> )                                                                  | S7          |
| 7            | Fig. S5. <sup>1</sup> H NMR of the product ( <b>4a</b> )                                                              | S8          |
| 8            | Fig. S6. <sup>13</sup> C NMR of the product ( <b>4a</b> )                                                             | S9          |
| 9            | Fig. S7. FT-IR spectrum of the product ( <b>4i</b> )                                                                  | S10         |
| 10           | Fig. S8. <sup>1</sup> H NMR of the product ( <b>4i</b> )                                                              | S11         |
| 11           | Fig. S9. <sup>13</sup> C NMR of the product ( <b>4i</b> )                                                             | S12         |

---

**Table 1.** Physical properties of geopolymer and NiFe<sub>2</sub>O<sub>4</sub>/geopolymer samples from BET analysis.

| Physical Properties                                 | Geopolymer Sample | NiFe <sub>2</sub> O <sub>4</sub> /geopolymer |
|-----------------------------------------------------|-------------------|----------------------------------------------|
| Surface area (m <sup>2</sup> /g)                    | 1.13              | 0.30                                         |
| Pore size (nm)                                      | 14.28             | 19.82                                        |
| The total pore volume of pores (cm <sup>3</sup> /g) | 0.004             | 0.069                                        |

**Table 2.** Optimization of different parameters for model reaction.<sup>a</sup>

| Entry | Solvent                         | Catalyst (g)                            | Condition/Temperature (°C) | Time (min) | Yield <sup>b</sup> (%) |
|-------|---------------------------------|-----------------------------------------|----------------------------|------------|------------------------|
| 1     | EtOH                            | Nanocomposite (0.03)                    | r.t. / 27                  | 277        | 75                     |
| 2     | EtOH                            | Nanocomposite (0.03)                    | Reflux / 90                | 155        | 89                     |
| 3     | Free-solvent                    | Nanocomposite (0.03)                    | Ultrasonic bath / 80       | 18         | trace                  |
| 4     | H <sub>2</sub> O                | Nanocomposite (0.03)                    | Ultrasonic bath / 80       | 18         | No reaction            |
| 5     | EtOH                            | Nanocomposite (0.03)                    | Ultrasonic bath / 80       | 18         | 91                     |
| 6     | MeOH                            | Nanocomposite (0.03)                    | Ultrasonic bath / 80       | 18         | 76                     |
| 7     | CH <sub>2</sub> Cl <sub>2</sub> | Nanocomposite (0.03)                    | Ultrasonic bath / 80       | 18         | 84                     |
| 8     | CH <sub>3</sub> CN              | Nanocomposite (0.03)                    | Ultrasonic bath / 80       | 18         | 69                     |
| 9     | Toluene                         | Nanocomposite (0.03)                    | Ultrasonic bath / 80       | 18         | trace                  |
| 10    | EtOH                            | -                                       | Ultrasonic bath / 80       | 30         | trace                  |
| 11    | EtOH                            | Bentonite (0.03)                        | Ultrasonic bath / 80       | 25         | No reaction            |
| 12    | EtOH                            | NiFe <sub>2</sub> O <sub>4</sub> (0.03) | Ultrasonic bath / 80       | 25         | 38                     |
| 13    | EtOH                            | Geopolymer (0.03)                       | Ultrasonic bath / 80       | 25         | 20                     |
| 14    | EtOH                            | Nanocomposite (0.01)                    | Ultrasonic bath / 80       | 18         | 65                     |
| 15    | EtOH                            | Nanocomposite (0.02)                    | Ultrasonic bath / 80       | 18         | 71                     |
| 16    | EtOH                            | Nanocomposite (0.04)                    | Ultrasonic bath / 80       | 18         | 89                     |
| 17    | EtOH                            | Nanocomposite (0.05)                    | Ultrasonic bath / 80       | 18         | 90                     |

<sup>a</sup>The reaction condition: benzil (0.8 mmol), benzaldehyde (0.8 mmol), ammonium acetate (2.0 mmol), Ethanol (7 mL) ultrasonic irradiations.

<sup>b</sup> Isolated yield.

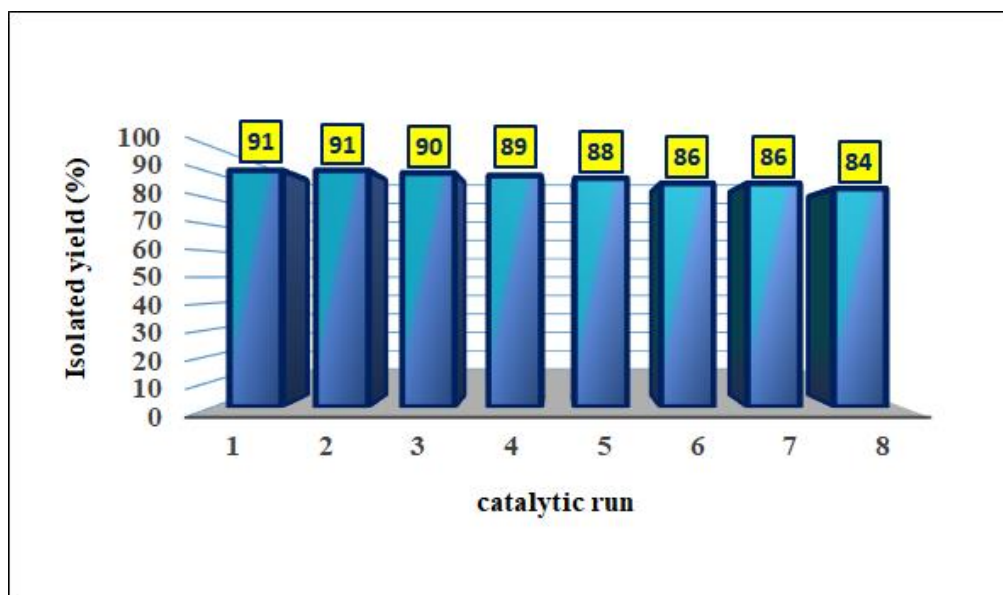

**Fig. S1.** The Reusability of NiFe<sub>2</sub>O<sub>4</sub>/geopolymer nanocatalyst in the synthesis of **4a**.

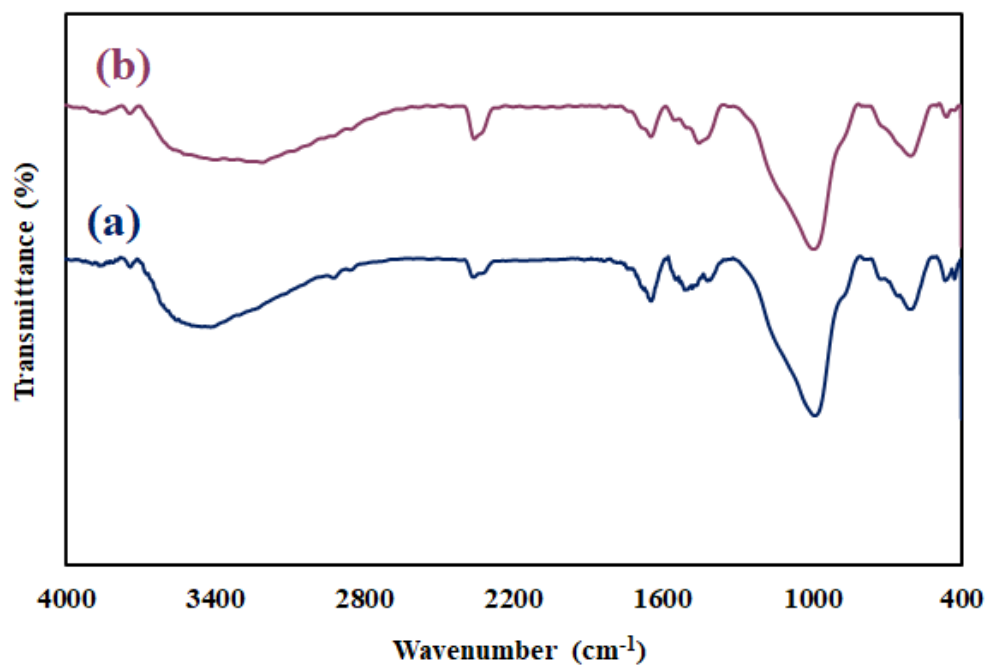

**Fig. S2.** FT-IR spectra of (a) NiFe<sub>2</sub>O<sub>4</sub>/geopolymer nanocomposite, (b) recycled nanocatalyst.

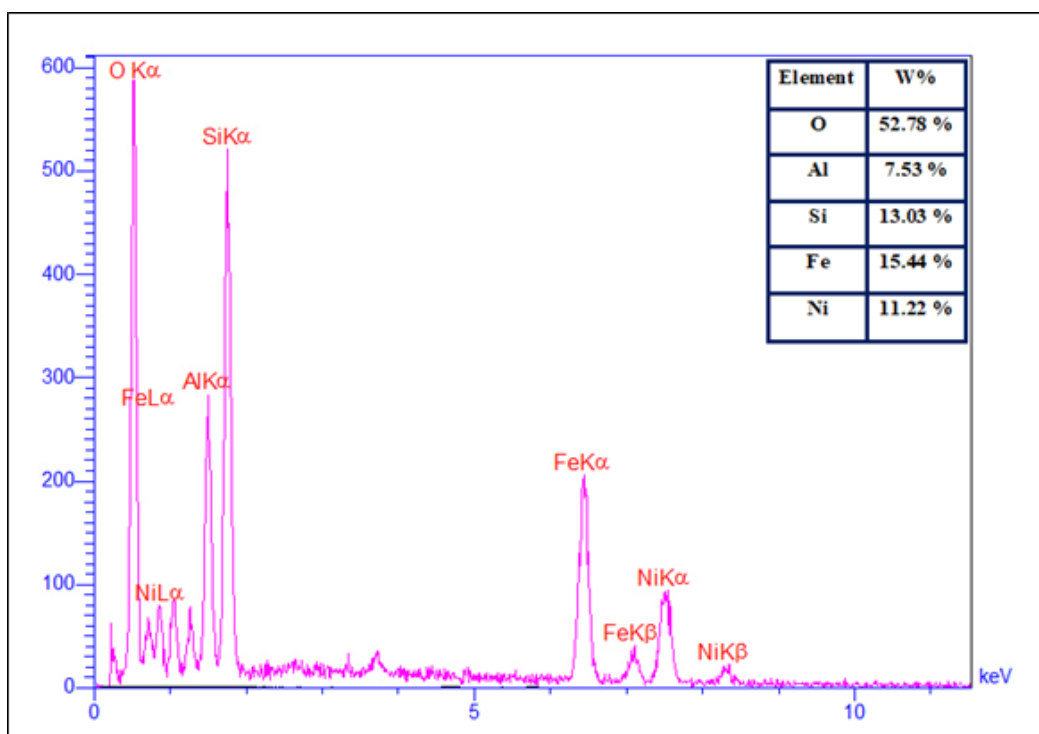

**Fig. S3.** The EDX analysis of recycled  $\text{NiFe}_2\text{O}_4$ /geopolymer nanocomposite.

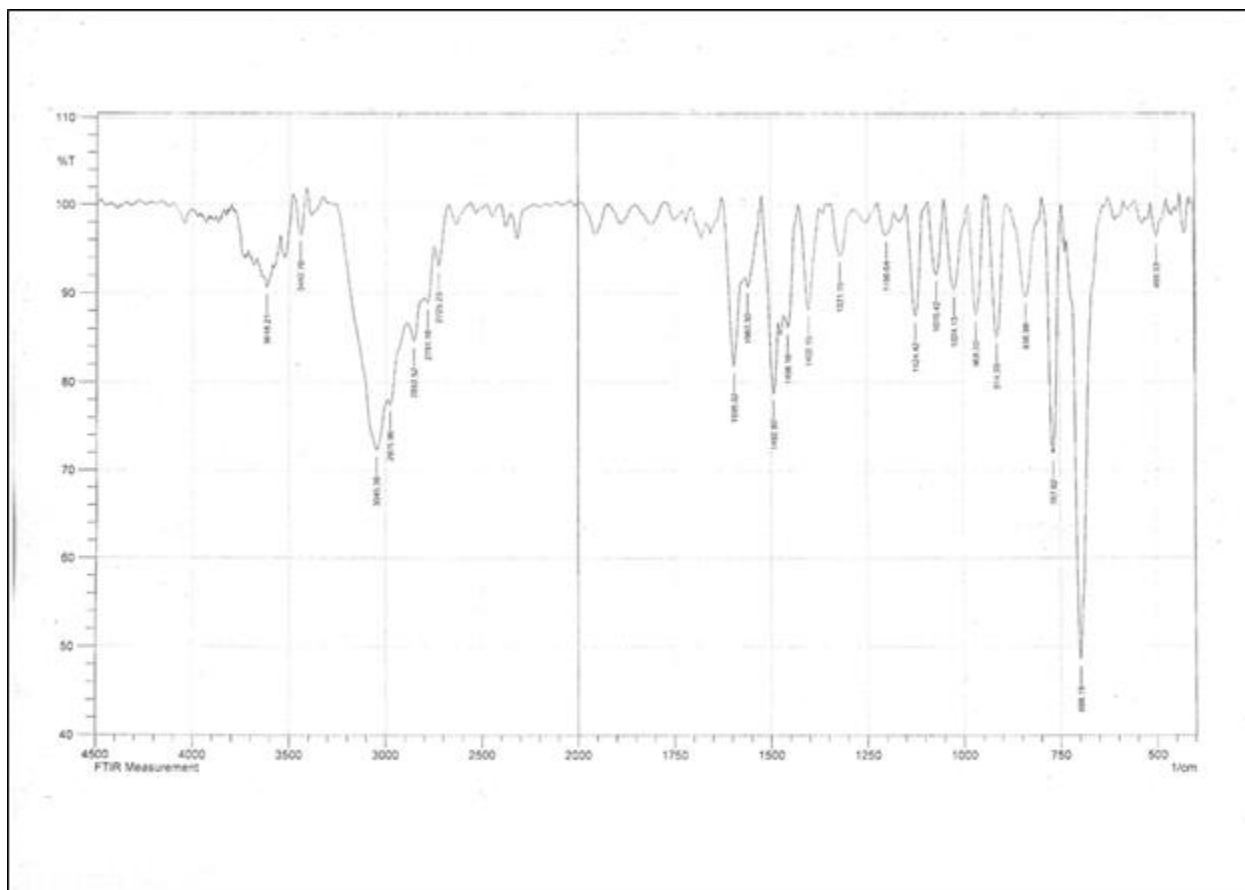

**Fig. S4.** The FT-IR spectrum of the product (**4a**).

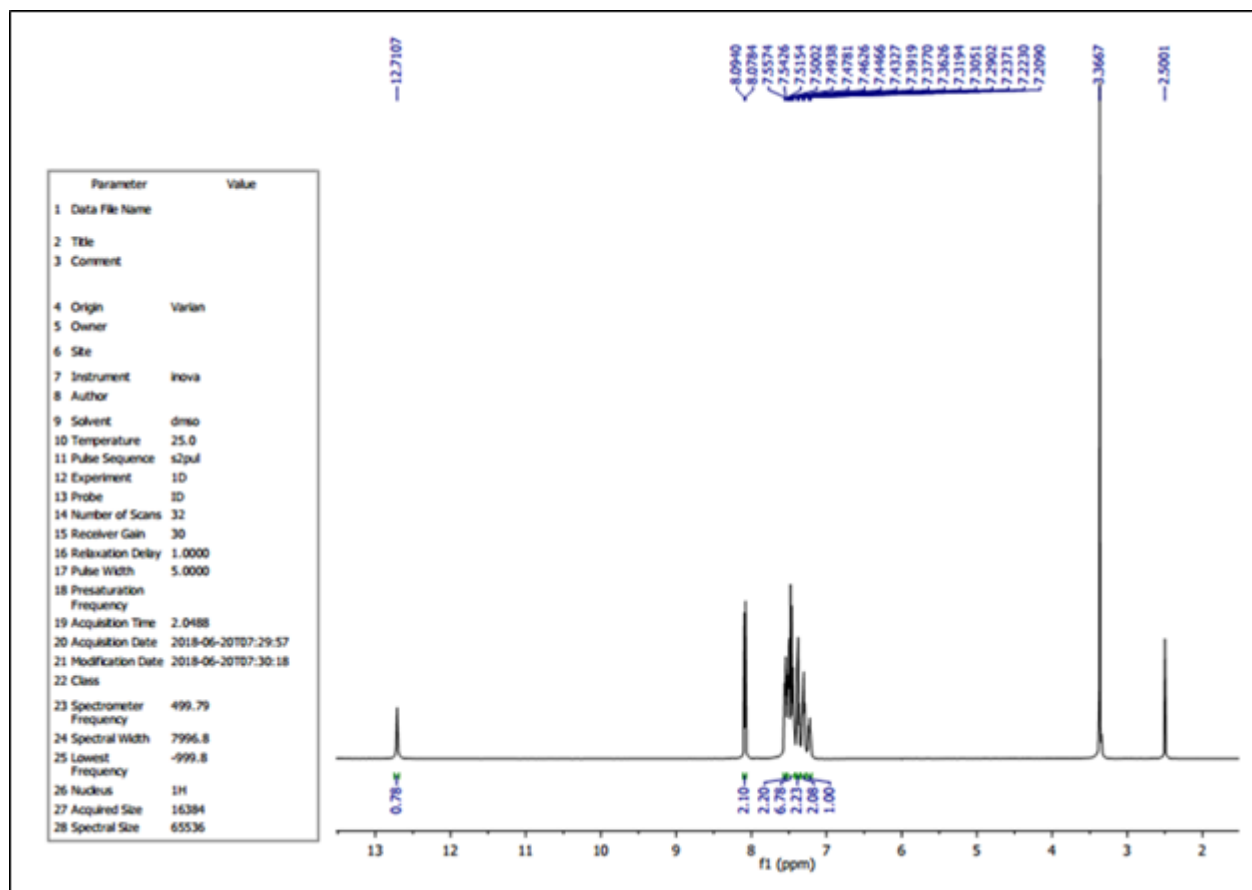

Fig. S5. The  $^1\text{H}$  NMR of the product (**4a**).



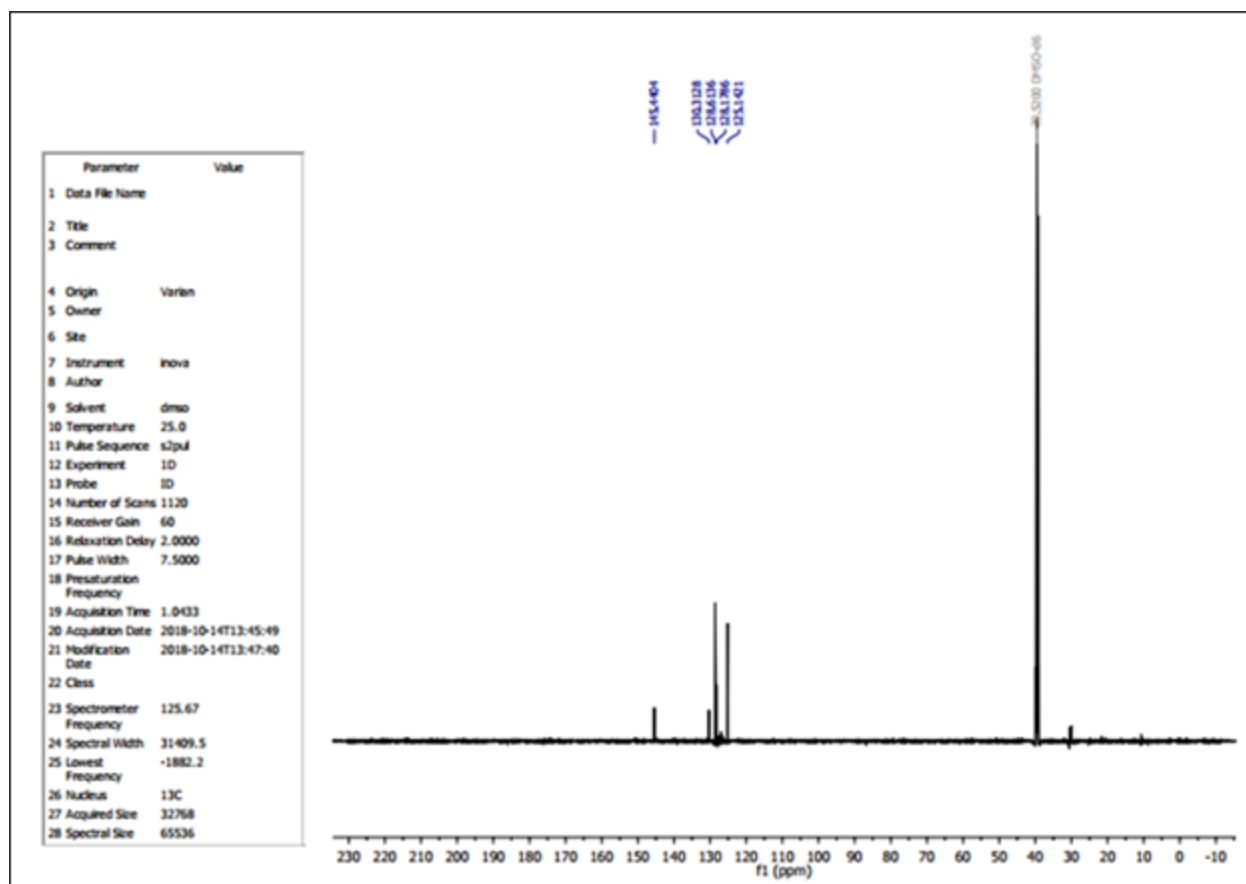

**Fig. S6.** The <sup>13</sup>C NMR of the product (**4a**).

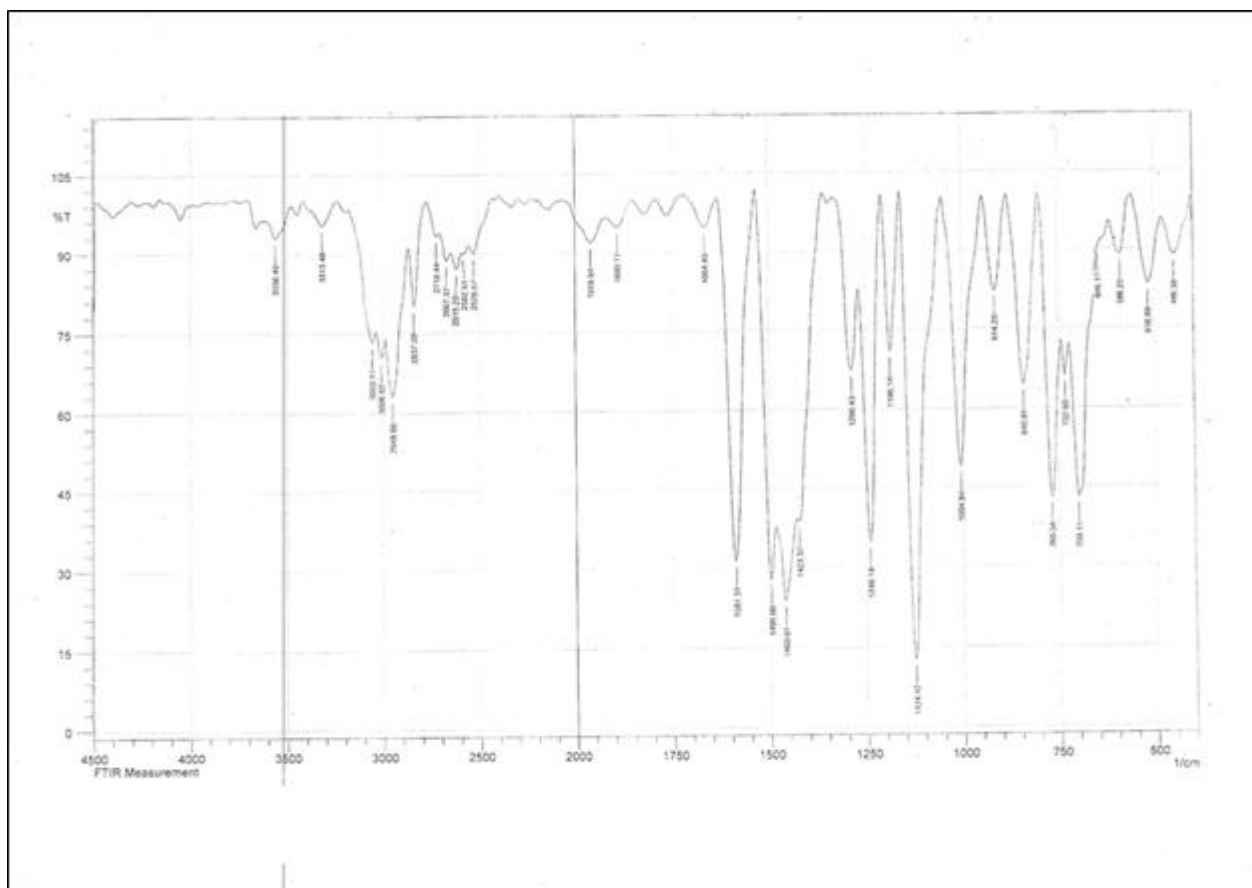

**Fig. S7.** The FT-IR spectrum of the product (**4i**).

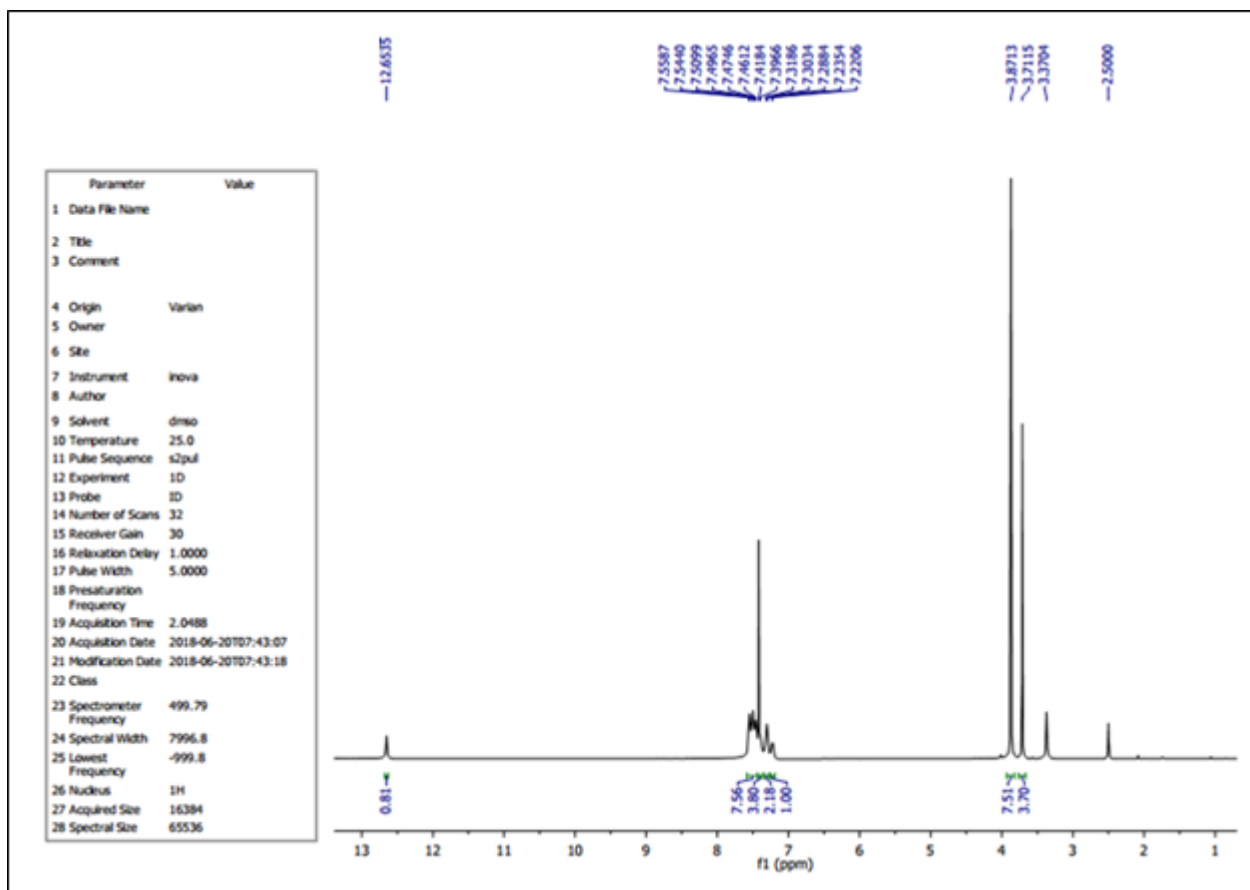

**Fig. S8.** The <sup>1</sup>H NMR of the product (**4i**).

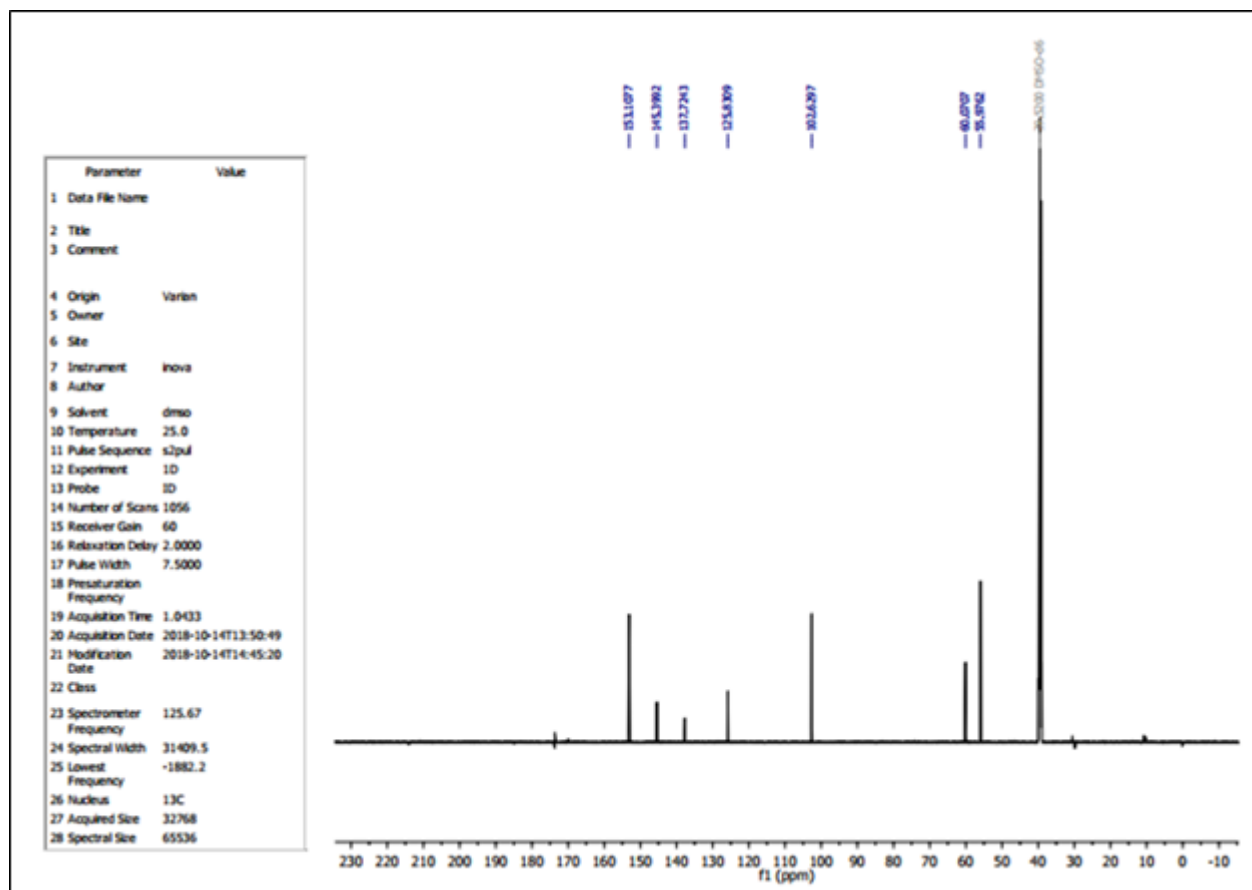

**Fig. S9.** The <sup>13</sup>C NMR of the product (**4i**).
